# Supplementary material
Source: PubMed Central journal article supplement (PMC7611698)
Supplement: EMS133096-supplement-Supplementary_Figure_and_Table.pdf [file EMS133096-supplement-Supplementary_Figure_and_Table.pdf]

## Supplementary Figures/Tables:

Supplementary Table 1: Biomarkers included in study by group

| Pathway                                       | Biomarker                                  | Abbreviation | Measurement in HCLD-<br>controls (pg/ml)(IQR) | Measurement in HCLD+<br>cases (pg/ml) (IQR) | P value |
|-----------------------------------------------|--------------------------------------------|--------------|-----------------------------------------------|---------------------------------------------|---------|
| Immune Activation                             | Beta-2-Microglobulin                       | β2M          | 2577312.1 (1026666.1)                         | 2708684.2 (1890922.2)                       | 0.166   |
|                                               | Granulocyte Colony Stimulating<br>Factor   | GCSF         | 104.0 (66.8)                                  | 81.3 (60.6)                                 | 0.016   |
|                                               | Interferon induced protein-10              | IP-10        | 77.8 (57.5)                                   | 115.9 (125.6)                               | <0.001  |
|                                               | C- Reactive Protein                        | CRP          | 351638.7 (810154.9)                           | 681709.5 (3846846.5)                        | 0.001   |
|                                               | Interferon Gamma                           | IFN-γ        | 77.8 (38.4)                                   | 108.4 (77.5)                                | <0.001  |
| Monocyte<br>Activation                        | Soluble CD14                               | sCD14        | 1630166.3 (677911.7)                          | 1959313.6 (863922.8)                        | <0.001  |
|                                               | Soluble CD163                              | sCD163       | 704196.9 (557007.0)                           | 824710.1 (644962.8)                         | 0.014   |
| T-Cell Activation                             | Soluble CD40-Ligand                        | sCD40-L      | 2912.1 (1184.9)                               | 4454.5 (2037.8)                             | <0.001  |
|                                               | Soluble CD27                               | sCD27        | 6318.9 (3315.5)                               | 8367.9 (4744.5)                             | <0.001  |
|                                               | Soluble CD25                               | sCD25        | 423.1 (272.4)                                 | 648.7 (367.6)                               | <0.001  |
|                                               | Soluble CCL5                               | sCCL5        | 36568.1 (32328.7)                             | 44381.6 (26809.5)                           | 0.022   |
| Endothelial Activation & Cellular<br>Adhesion | E-Selectin                                 | sE-Selectin  | 28610.0 (13313.1)                             | 35903.1 (18481.5)                           | <0.001  |
|                                               | P-Selectin                                 | sP-Selectin  | 28284.5 (12424.7)                             | 30784.6 (13095.8)                           | 0.011   |
|                                               | Vascular cell adhesion molecule 1          | VCAM-1       | 830248.8 (553079.4)                           | 1065117.6 (698897.2)                        | <0.001  |
|                                               | Intracellular cell adhesion molecule 1     | ICAM-1       | 247118.8 (231948.2)                           | 293854.2 (287375.8)                         | 0.139   |
|                                               | Vascular endothelial growth factor         | VEGF         | 69.3 (50.6)                                   | 49.3 (40.0)                                 | 0.027   |
| Coagulation                                   | D-Dimer and fibrin degradation<br>products | D-Dimer      | 1306651.5 (1021554.2)                         | 1903081.0 (2002126.2)                       | <0.001  |
| Apoptosis                                     | Fas                                        | Fas          | 4517.6 (1440.8)                               | 5094.7 (1870.0)                             | 0.001   |
|                                               | Growth differentiation factor 15**         | GDF-15       | 797.3 (877.2)                                 | 828.2 (1125.3)                              | 0.864   |

|                                  |                              |        |                   |                   |        |
|----------------------------------|------------------------------|--------|-------------------|-------------------|--------|
| Angi<br>oge                      | Angiopoietin-1*              | ANG-1  | 11669.8 (12856.8) | 14868.1 (12936.1) | 0.013  |
| Extracellular matrix degradation | Matrix metalloproteinase-1   | MMP-1  | 1232.7 (1139.6)   | 1577.7 (1811.6)   | 0.021  |
|                                  | Matrix metalloproteinase-3   | MMP-3  | 3570.5 (3392.8)   | 3506.9 (3865.6)   | 0.929  |
|                                  | Matrix metalloproteinase-7   | MMP-7  | 1173.8 (685.0)    | 1490.0 (939.7)    | <0.001 |
|                                  | Matrix metalloproteinase-8   | MMP-8  | 2868.5 (5383.5)   | 4013.2 (6760.7)   | 0.049  |
|                                  | Matrix metalloproteinase-10  | MMP-10 | 736.7 (607.9)     | 1071.4 (844.9)    | <0.001 |
|                                  | Matrix metalloproteinase-12* | MMP-12 | 21.6 (19.8)       | 28.5 (19.8)       | 0.002  |

\* Indicates measurements falling below limit of detection. Assigned half the lowest measured value from the whole population (MMP-12 n=54, Angiopoietin 1 n=5). \*\* Indicates missing data (GDF-15 n=1). Differences between groups assessed by Kruskal Wallis non-parametric test

Supplementary Table 2 – Principal Component Analysis

|                        | Whole Population (n=410) |            |                         | HCLD Population (n=336) |            |                       |
|------------------------|--------------------------|------------|-------------------------|-------------------------|------------|-----------------------|
|                        | Eigenvalue               | % Variance | Cumulative Variance (%) | Eigenvalue              | % Variance | Cumulative % Variance |
| Principal Component 1  | 5.155                    | 20.622     | 20.622                  | 5.075                   | 20.3       | 20.3                  |
| Principal Component 2  | 2.61                     | 10.442     | 31.064                  | 2.758                   | 11.03      | 31.331                |
| Principal Component 3  | 2.158                    | 8.631      | 39.695                  | 2.02                    | 8.081      | 39.412                |
| Principal Component 4  | 1.85                     | 7.402      | 47.096                  | 1.672                   | 6.686      | 46.098                |
| Principal Component 5  | 1.325                    | 5.302      | 52.398                  | 1.355                   | 5.422      | 51.52                 |
| Principal Component 6  | 1.29                     | 5.16       | 57.558                  | 1.282                   | 5.127      | 56.647                |
| Principal Component 7  | 1.037                    | 4.15       | 61.707                  | 1.05                    | 4.199      | 60.846                |
| Principal Component 8  | 0.991                    | 3.962      | 65.67                   | 1.019                   | 4.076      | 64.922                |
| Principal Component 9  | 0.894                    | 3.577      | 69.246                  | 0.953                   | 3.813      | 68.734                |
| Principal Component 10 | 5.155                    | 3.291      | 72.537                  | 0.858                   | 3.431      | 72.165                |

Eigenvalues and percentage of variance explained for each factor derived from principal component analysis in whole population and HCLD population. Grey squares represent dimensions with eigenvalues < 1 (not included in downstream analysis).

Supplementary Table 3: Biomarkers and HCLD Status

| Biomarker (Log <sub>10</sub> , Scaled) | Univariate Logistic Regression, OR (CI, P) | Adjusted Logistic Regression, OR (CI, P) |
|----------------------------------------|--------------------------------------------|------------------------------------------|
| MMP-1                                  | 1.41 (1.09-1.84, p=0.009)                  | 1.36 (1.04-1.79, p=0.028)                |
| MMP-3                                  | 1.02 (0.79-1.31, p=0.902)                  | 1.05 (0.78-1.44, p=0.754)                |
| MMP-7                                  | 1.52 (1.18-1.98, p=0.001)                  | 1.42 (1.07-1.90, p=0.015)                |
| MMP-8                                  | 1.24 (0.96-1.61, p=0.095)                  | 1.14 (0.88-1.48, p=0.340)                |
| MMP-10                                 | 1.70 (1.29-2.25, p<0.001)                  | 1.61 (1.20-2.19, p=0.002)                |
| MMP-12*                                | 1.25 (0.98-1.58, p=0.063)                  | 1.25 (0.95-1.63, p=0.101)                |
| Angiopoietin-1                         | 1.49 (1.19-1.90, p=0.001)                  | 1.53 (1.20-1.96, p=0.001)                |
| Beta-2-Microglobulin                   | 1.14 (0.89-1.46, p=0.302)                  | 1.03 (0.75-1.42, p=0.837)                |
| sCCL5                                  | 1.36 (1.06-1.75, p=0.015)                  | 1.37 (1.05-1.80, p=0.023)                |
| sCD14                                  | 1.96 (1.51-2.57, p<0.001)                  | 2.23 (1.66-3.05, p<0.001)                |
| sCD25                                  | 2.74 (2.01-3.81, p<0.001)                  | 2.85 (2.00-4.19, p<0.001)                |
| sCD27                                  | 2.26 (1.65-3.16, p<0.001)                  | 2.05 (1.48-2.91, p<0.001)                |
| sCD40-L                                | 2.89 (2.12-4.06, p<0.001)                  | 2.96 (2.12-4.25, p<0.001)                |
| sCD163                                 | 1.33 (1.04-1.72, p=0.024)                  | 1.32 (1.00-1.76, p=0.052)                |
| CRP                                    | 1.55 (1.20-2.04, p=0.001)                  | 1.48 (1.12-1.98, p=0.006)                |
| IP-10/CXCL10                           | 1.93 (1.42-2.69, p<0.001)                  | 1.89 (1.36-2.72, p<0.001)                |
| D-Dimer +                              | 1.68 (1.27-2.25, p<0.001)                  | 1.68 (1.25-2.29, p=0.001)                |
| sE-Selectin                            | 2.08 (1.57-2.81, p<0.001)                  | 2.05 (1.52-2.82, p<0.001)                |
| Fas                                    | 1.59 (1.23-2.08, p=0.001)                  | 1.59 (1.21-2.12, p=0.001)                |
| GCSF                                   | 0.75 (0.58-0.97, p=0.032)                  | 0.68 (0.50-0.91, p=0.010)                |
| GDF-15                                 | 1.04 (0.81-1.34, p=0.778)                  | 0.99 (0.75-1.32, p=0.950)                |
| ICAM-1                                 | 1.05 (0.81-1.33, p=0.701)                  | 1.00 (0.75-1.30, p=0.981)                |
| IFN-γ                                  | 1.75 (1.35-2.28, p<0.001)                  | 2.63 (1.77-4.12, p<0.001)                |
| sP-Selectin                            | 1.29 (0.99-1.69, p=0.064)                  | 1.22 (0.92-1.63, p=0.175)                |
| VCAM-1                                 | 1.70 (1.29-2.30, p<0.001)                  | 1.56 (1.18-2.10, p=0.003)                |
| VEGF                                   | 0.79 (0.61-1.02, p=0.070)                  | 0.73 (0.55-0.95, p=0.022)                |

Logistic regression results for all biomarkers included in the study. Abbreviations: OR=Odds Ratio, CI=Confidence Interval, P = P-Value). Adjusted analysis controlled for age, sex, study site, height for age z-scores, HIV viral suppression and having ever been treated for TB.

\*MMP-12 dropped from downstream analysis due to high levels of missingness

Supplementary Table 4: Association of biomarkers with FEV1 z-score

| Biomarker            | Univariate Linear<br>Regression $\beta \pm SE$ | P-Value | Adjusted Linear<br>regression $\beta \pm SE$ | P-value |
|----------------------|------------------------------------------------|---------|----------------------------------------------|---------|
| MMP-1                | -0.063 $\pm$ 0.039                             | 0.109   | -0.034 $\pm$ 0.039                           | 0.374   |
| MMP-3                | 0.021 $\pm$ 0.039                              | 0.595   | 0.013 $\pm$ 0.042                            | 0.767   |
| MMP-7                | -0.059 $\pm$ 0.039                             | 0.132   | -0.021 $\pm$ 0.039                           | 0.586   |
| MMP-8                | -0.122 $\pm$ 0.039                             | 0.002   | -0.097 $\pm$ 0.039                           | 0.012   |
| MMP-10               | -0.161 $\pm$ 0.038                             | 0       | -0.132 $\pm$ 0.04                            | 0.001   |
| MMP-12               | -0.022 $\pm$ 0.039                             | 0.571   | -0.026 $\pm$ 0.039                           | 0.502   |
| Angiotensin-1        | 0.08 $\pm$ 0.039                               | 0.041   | 0.077 $\pm$ 0.039                            | 0.046   |
| Beta-2-Microglobulin | -0.055 $\pm$ 0.039                             | 0.161   | -0.063 $\pm$ 0.044                           | 0.151   |
| sCCL5                | -0.04 $\pm$ 0.039                              | 0.311   | -0.04 $\pm$ 0.039                            | 0.304   |
| sCD14                | 0.046 $\pm$ 0.039                              | 0.238   | 0.05 $\pm$ 0.039                             | 0.2     |
| sCD25                | -0.07 $\pm$ 0.039                              | 0.073   | -0.035 $\pm$ 0.041                           | 0.39    |
| sCD27                | -0.071 $\pm$ 0.039                             | 0.069   | -0.04 $\pm$ 0.04                             | 0.311   |
| sCD40-L              | -0.034 $\pm$ 0.039                             | 0.389   | -0.026 $\pm$ 0.039                           | 0.508   |
| sCD163               | 0.018 $\pm$ 0.039                              | 0.64    | 0.023 $\pm$ 0.04                             | 0.563   |
| CRP                  | -0.149 $\pm$ 0.038                             | 0       | -0.128 $\pm$ 0.038                           | 0.001   |
| IP-10/CXCL10         | -0.089 $\pm$ 0.039                             | 0.023   | -0.08 $\pm$ 0.04                             | 0.048   |
| D-Dimer +            | -0.062 $\pm$ 0.039                             | 0.113   | -0.055 $\pm$ 0.039                           | 0.165   |
| sE-Selectin          | -0.104 $\pm$ 0.039                             | 0.008   | -0.082 $\pm$ 0.039                           | 0.037   |
| Fas                  | 0.083 $\pm$ 0.039                              | 0.035   | 0.082 $\pm$ 0.039                            | 0.033   |
| GCSF                 | -0.106 $\pm$ 0.039                             | 0.007   | -0.11 $\pm$ 0.039                            | 0.006   |
| GDF-15               | -0.028 $\pm$ 0.039                             | 0.474   | -0.009 $\pm$ 0.04                            | 0.821   |
| ICAM-1               | -0.04 $\pm$ 0.039                              | 0.312   | -0.016 $\pm$ 0.039                           | 0.679   |
| IFN- $\gamma$        | 0.013 $\pm$ 0.039                              | 0.735   | -0.005 $\pm$ 0.042                           | 0.905   |
| sP-Selectin          | -0.028 $\pm$ 0.039                             | 0.473   | -0.023 $\pm$ 0.039                           | 0.55    |
| VCAM-1               | -0.105 $\pm$ 0.039                             | 0.007   | -0.09 $\pm$ 0.039                            | 0.021   |
| VEGF                 | -0.117 $\pm$ 0.039                             | 0.003   | -0.113 $\pm$ 0.039                           | 0.004   |

Univariate and adjusted linear regression results for biomarkers and FEV1 z-score in the HCLD group. SE= Standard Error. Adjusted analysis controlled for age, sex, study site, height for age z-scores, HIV viral suppression and having ever been treated for TB.

Supplementary Table 5: Principal components associated with HCLD and FEV-1 z-score

|                       | Adjusted Logistic Regression Results<br>(OR (95% CI, p)) | Adjusted Linear Regression Results<br>( $\beta$ (SE), p) |
|-----------------------|----------------------------------------------------------|----------------------------------------------------------|
| Principal Component 1 | 1.54 (1.33-1.80, p<0.001)                                | -0.044 $\pm$ 0.018, p=0.014                              |
| Principal Component 2 | 0.97 (0.81-1.16, p=0.728)                                | 0.004 $\pm$ 0.024, p=0.873                               |
| Principal Component 3 | 1.44 (1.16-1.81, p=0.001)                                | -0.042 $\pm$ 0.029, p=0.138                              |
| Principal Component 4 | 0.62 (0.49-0.77, p<0.001)                                | 0.096 $\pm$ 0.03, p=0.001                                |
| Principal Component 5 | 0.71 (0.54-0.92, p=0.012)                                | -0.092 $\pm$ 0.036, p=0.011                              |
| Principal Component 6 | 0.74 (0.58-0.94, p=0.014)                                | -0.031 $\pm$ 0.036, p=0.395                              |
| Principal Component 7 | 1.47 (1.11-1.95, p=0.007)                                | 0.082 $\pm$ 0.038, p=0.031                               |
| Principal Component 8 |                                                          | 0.004 $\pm$ 0.039, p=0.911                               |

Logistic regression in whole population, linear regression in only HCLD+ participants. All analyses include age, sex, site, height for age z score, HIV viral control and having ever been treated for TB as confounders.

Supplementary Table 6: Sensitivity and specificity of biomarkers for HCLD.

|                       | <b>Threshold</b> | <b>Sensitivity</b> | <b>Specificity</b> | <b>AUC</b> |
|-----------------------|------------------|--------------------|--------------------|------------|
| MMP-1                 | 3.297            | 0.77               | 0.387              | 0.586      |
| MMP-3                 | 3.613            | 0.473              | 0.595              | 0.497      |
| MMP-7                 | 3.196            | 0.784              | 0.452              | 0.635      |
| MMP-8                 | 3.25             | 0.405              | 0.753              | 0.573      |
| MMP-10                | 2.919            | 0.622              | 0.658              | 0.643      |
| MMP-12                | 1.45             | 0.77               | 0.509              | 0.617      |
| Angiopoietin-1        | 3.808            | 0.284              | 0.908              | 0.593      |
| Beta-2-Microglobulin  | 6.505            | 0.797              | 0.396              | 0.551      |
| sCCL5                 | 4.509            | 0.486              | 0.747              | 0.585      |
| sCD14                 | 6.324            | 0.851              | 0.435              | 0.685      |
| sCD25                 | 2.651            | 0.595              | 0.812              | 0.74       |
| sCD27                 | 3.837            | 0.608              | 0.705              | 0.688      |
| sCD40-Ligand          | 3.526            | 0.716              | 0.812              | 0.768      |
| sCD163                | 5.941            | 0.689              | 0.485              | 0.591      |
| CRP                   | 6.143            | 0.824              | 0.396              | 0.626      |
| IP-10/CXCL10          | 1.918            | 0.568              | 0.729              | 0.665      |
| D-Dimer +             | 6.165            | 0.635              | 0.643              | 0.648      |
| sE-Selectin           | 4.493            | 0.622              | 0.679              | 0.687      |
| Fas                   | 3.715            | 0.757              | 0.47               | 0.627      |
| GCSF                  | 2.004            | 0.541              | 0.673              | 0.589      |
| GDF-15                | 3.041            | 0.716              | 0.372              | 0.506      |
| ICAM-1                | 5.593            | 0.797              | 0.339              | 0.555      |
| IFN- $\gamma$         | 2.03             | 0.838              | 0.512              | 0.697      |
| sP-Selectin           | 4.47             | 0.635              | 0.562              | 0.595      |
| VCAM-1                | 5.867            | 0.432              | 0.815              | 0.641      |
| VEGF                  | 1.824            | 0.554              | 0.682              | 0.582      |
| Principal Component 1 | -0.485           | 0.797              | 0.643              | 0.76       |
| Principal Component 2 | -0.405           | 0.716              | 0.387              | 0.541      |
| Principal Component 3 | -1.035           | 0.473              | 0.821              | 0.637      |
| Principal Component 4 | 0.358            | 0.649              | 0.622              | 0.642      |
| Principal Component 5 | -0.554           | 0.838              | 0.345              | 0.589      |
| Principal Component 6 | 0.192            | 0.568              | 0.604              | 0.578      |
| Principal Component 7 | 0.219            | 0.716              | 0.452              | 0.58       |

Sensitivity and specificity refer to values at the specified threshold. Biomarker levels are

$\log_{10}$  transformed. AUC = Area Under the Curve

\





## Supplementary Figure 1: Biomarker Correlations

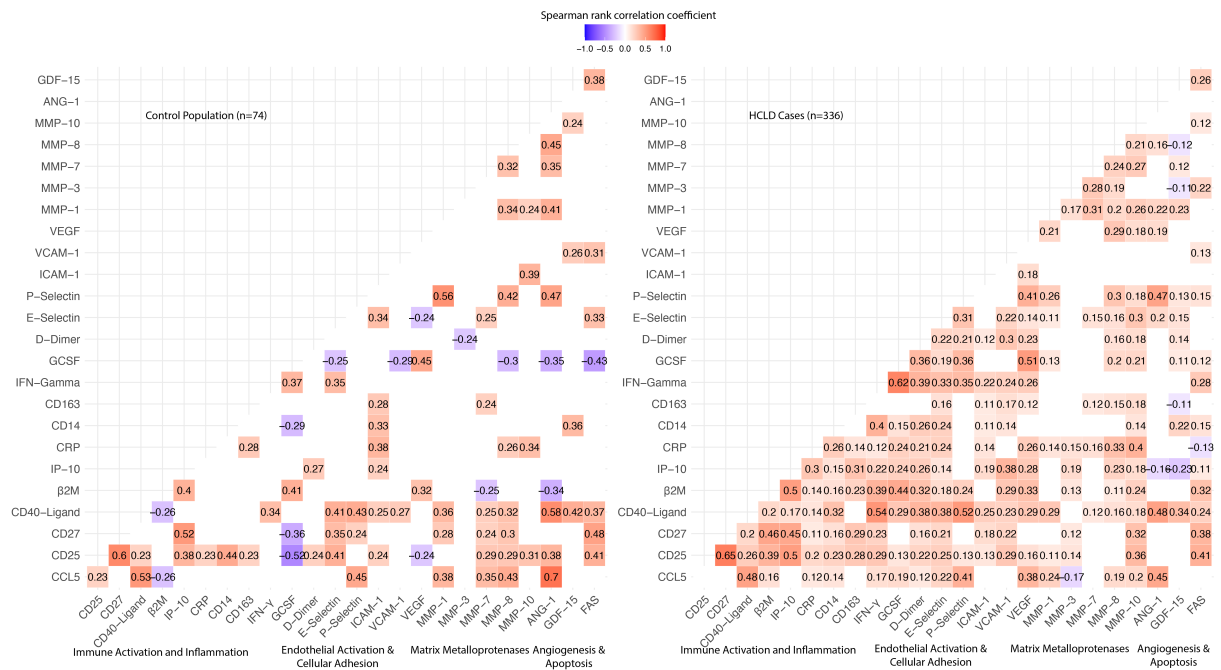

Spearman rank correlations between biomarkers in A) HCLD- controls B) HCLD+ cases.

Number within square indicates spearman rank correlation coefficient between biomarkers.

Blank squares represent no significant correlation between biomarker pairs ( $p > .05$ ).

## Supplementary Figure 2: Contribution of biomarkers principle components

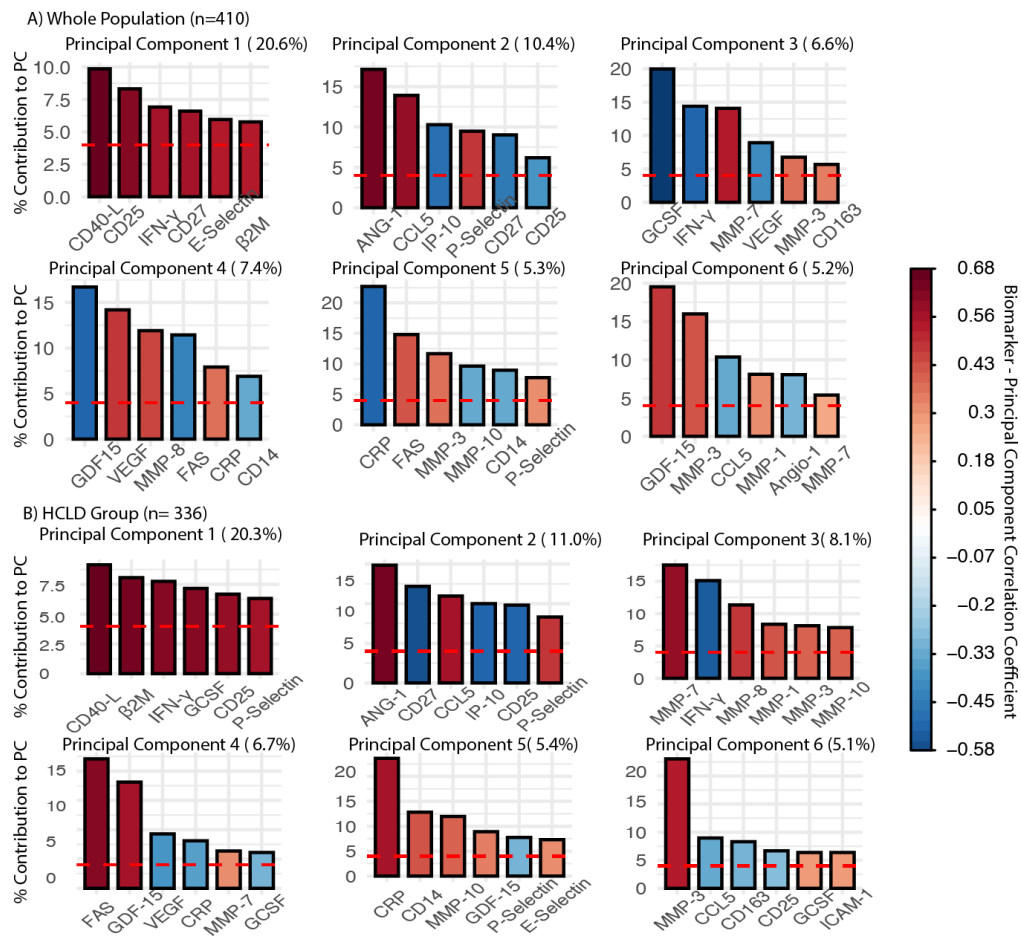

Contribution of individual biomarkers to principal components derived from the A) Whole population and B) Participants with HCLD. Percentages in brackets show how much of variation of biomarker data is explained by each principal component. Top 6 biomarkers contributing to each component are shown. Dashed red line indicates contribution of biomarker if all equally contributing.

Supplementary Figure 3: Sensitivity and Specificity of markers for HCLD

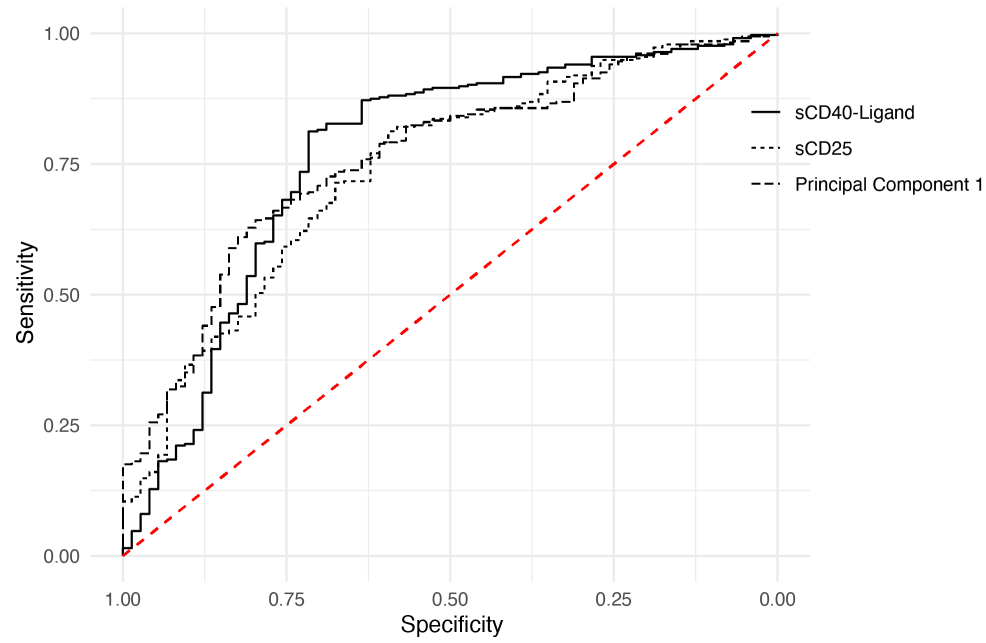

ROC curve for top three performing variables. Only variables with AUC > 0.7 included

Diagonal line represents no predictive ability. AUC = Area under the Curve
